# Supplementary material
Source: MDPI journal article supplement (https://www.mdpi.com/2073-4433/11/3/230)
Supplement: s1 [file s1]

## Supplementary Materials:

### Influence of Quasi-Periodic Oscillation of Atmospheric Variables on Radiation Fog over A Mountainous Region of Korea

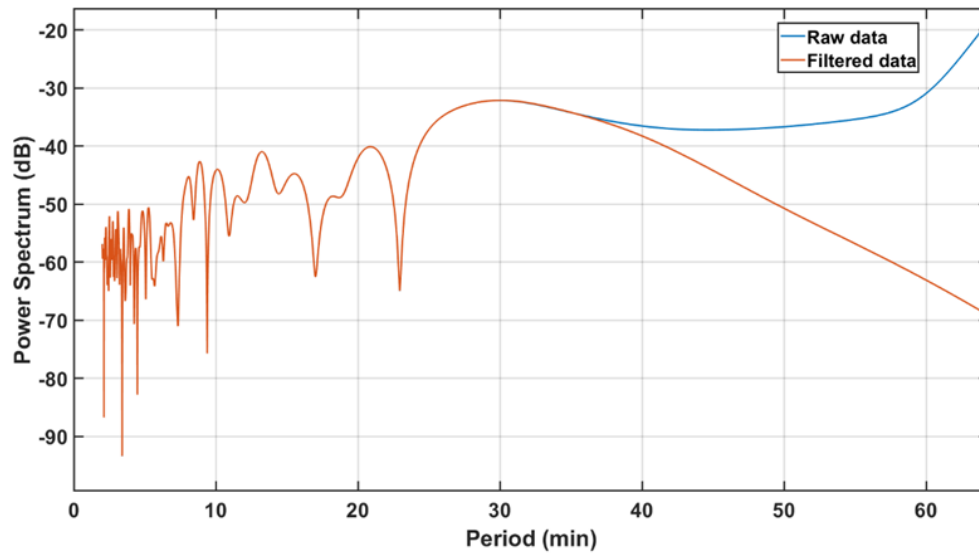

**Figure S1.** The power spectrum of a pressure for the time series. Blue line represents pressure data and red line represents filtered pressure data
